# Supplementary material for: Use of Artificial Intelligence Chatbots for Cancer Treatment Information
Source: PubMed Central journal article supplement (PMC10450584; doi:10.1001/jamaoncol.2023.2954), 2023-08-24
Supplement: jamaoncol-e232954-s002.pdf [file jamaoncol-e232954-s002.pdf]

## Data Sharing Statement

Chen. Use of Artificial Intelligence Chatbots for Cancer Treatment Information. *JAMA Oncol.*  
Published August 24, 2023. doi:10.1001/jamaoncol.2023.2954

### Data

**Data available:** Yes

**Data types:** Data (not involving human participants)

**How to access data:** All data, including prompts, ChatGPT output, and scoring guidelines are made available through the project github: [https://github.com/AIM-Harvard/ChatGPT\\_NCCN](https://github.com/AIM-Harvard/ChatGPT_NCCN)

**When available:** With publication

### Supporting Documents

**Document types:** Other (please specify)

**Additional Information:** All data used in this study and scoring guidelines are made available at the project github: [https://github.com/AIM-Harvard/ChatGPT\\_NCCN](https://github.com/AIM-Harvard/ChatGPT_NCCN)

**How to access documents:** All data used in this study and the scoring guidelines are made available at the project github: [https://github.com/AIM-Harvard/ChatGPT\\_NCCN](https://github.com/AIM-Harvard/ChatGPT_NCCN)

**When available:** beginning date: 03-15-2023

### Additional Information

**Who can access the data:** Any researchers who would like to use the data.

**Types of analyses:** Any purpose.

**Mechanisms of data availability:** Without investigator support.

**Any additional restrictions:** No restrictions.
